# Supplementary material for: Differential Impact of Supported Housing on Selected Subgroups of Homeless Veterans With Substance Abuse Histories
Source: Atypon-hosted journal article supplement (doi:10.1176/appi.ps.201000229), 2012-12-01

**Figure 1. Significant difference in Days Homeless between HUD-VASH and ICM by Race**

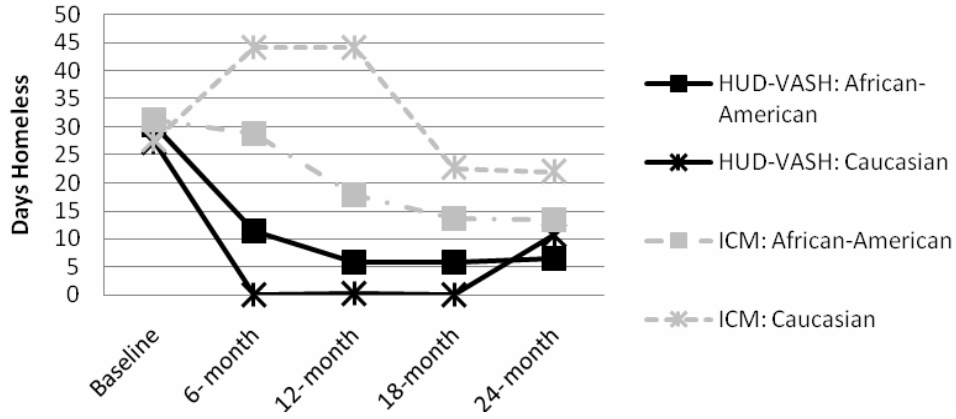

**Figure 2. Significant difference in ASI-Drug Scores between HUD-VASH and ICM by Race**

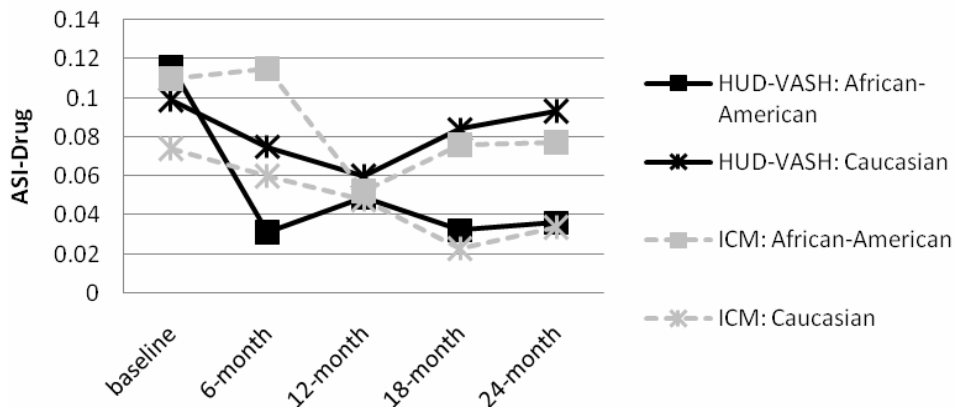

**Figure 3. Significant difference in Days Employed between HUD-VASH and Treatment as Usual by Race**

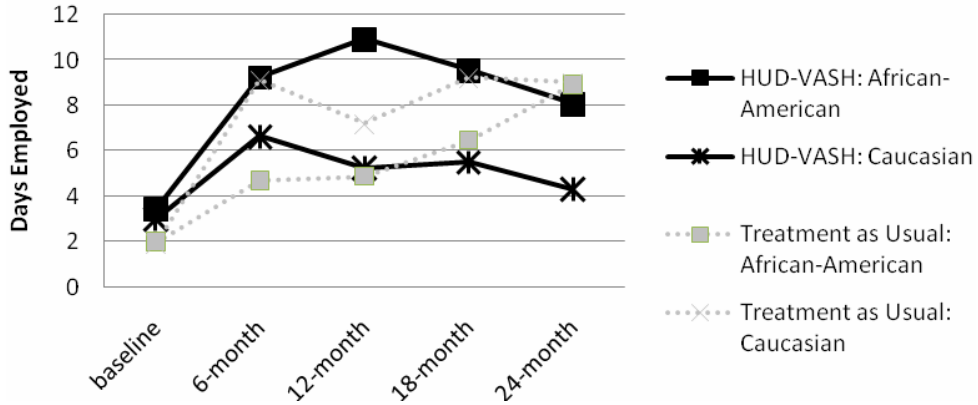

**Figure 4. Significant difference in Days Homeless between HUD-VASH and Treatment as Usual by Co-Occurring Diagnosis**

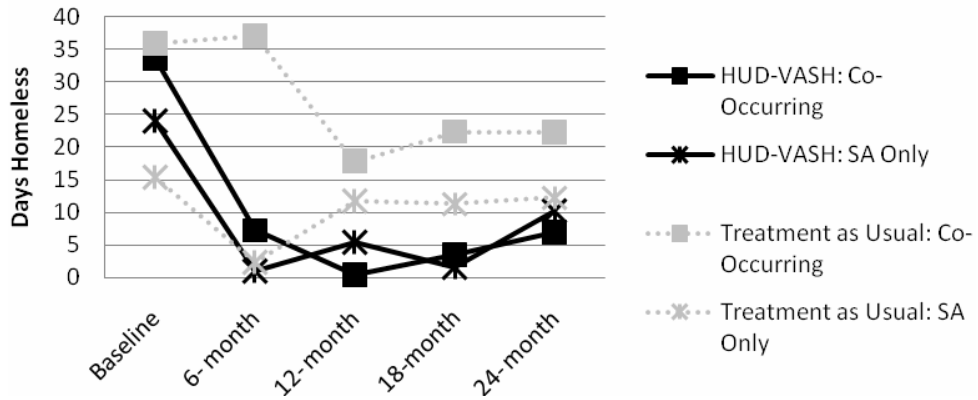

**Figure 5. Significant Difference in Days Homeless Between HUD-VASH and ICM by Active Substance Use**

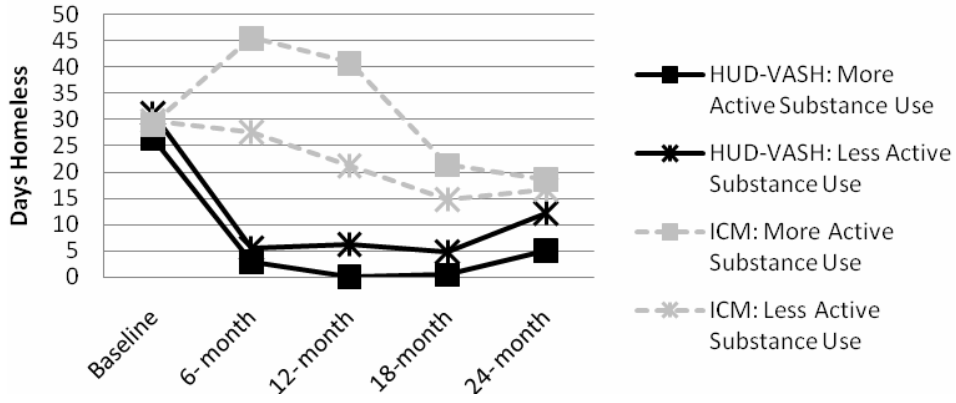

Supplement: 1195_ds001.pdf [file 1195_ds001.pdf]
